# Supplementary material for: An integrated observation dataset of the hydrological-thermal-deformationdynamics in the permafrost slopes and engineeringinfrastructure in the Qinghai-Tibet Engineering Corridor
Source: Copernicus journal article supplement (doi:10.5194/essd-2020-106), 2020-07-15
Supplement: Supplementary file [file essd-2020-106-AC2-supplement.pdf]

Authors reply to the comments by Anonymous Referee of the manuscript *essd-2020-106*

# **“An integrated observation dataset of the hydrological-thermal-deformation dynamics in the permafrost slopes and engineering infrastructure in the Qinghai-Tibet Engineering Corridor”**

by Lihui Luo et al.

We thank Anonymous Referee #2 for valuable feedback, which helped us improve our manuscript. Please find below the Reviewer comments in black, [Author responses in green](#), and [Changes to the manuscript in blue](#).

## **Response to referee comment 2:**

The manuscript by Luo et al. described multiple observation data sets in the Qinghai-Tibet Engineering Corridor (QTEC). I agree with the previous reviewer's comments about the hard-won data in this manuscript. What is particularly commendable is that the author chose a study area where railway, highway and electrical towers are all distributed on a frozen soil slope. Temperature, air and ground temperature, is the most important indicator of changes in frozen soil. The author uses drones equipped with thermal infrared sensors to monitor spatial changes in surface ground temperature. This data should be relatively rare. This set of data is of great significance for studying the interaction between frozen soil engineering and slopes. Overall, this is a well-prepared manuscript with useful data. The study area is very typical and distinctive.

[Thank you for the insightful comments. In revising the paper, we have carefully considered your comments and suggestions. We agree with your comments regarding the metadata, code execution, and data description, among others. To address these concerns, we have made the following modifications to](#)

the manuscript: (1) we have added README.md files for the entire dataset of the manuscript and for each data set, such as meteorological and ground observations, TLS measurements, UAV RGB and TIR images, and R code of permafrost indices and visualization, and generated the corresponding README pdf and html files; (2) we have checked the integrity of the data file and added the missing data, including InSAR data and the study area boundary shapefile data in the TLS measurement dataset; (3) we have added vector and raster data of the boundary, DSM (digital surface model), and mosaic of the study area processed by UAV monitoring data; (4) we have renamed some data files because it was difficult for data users to obtain certain data due to naming reasons, and reorganized the file directory, (5) we have modified many inappropriate expressions, including the title; (6) we have updated the data DOI; (7) we have deleted some references with little relevance and added some related references; and (8) we have improved the flow of the language throughout the manuscript (Figure R1). We have tried our best to address each of your points in detail. We feel the revision represents an improvement, and we hope that you agree. For more details, please see our replies below.

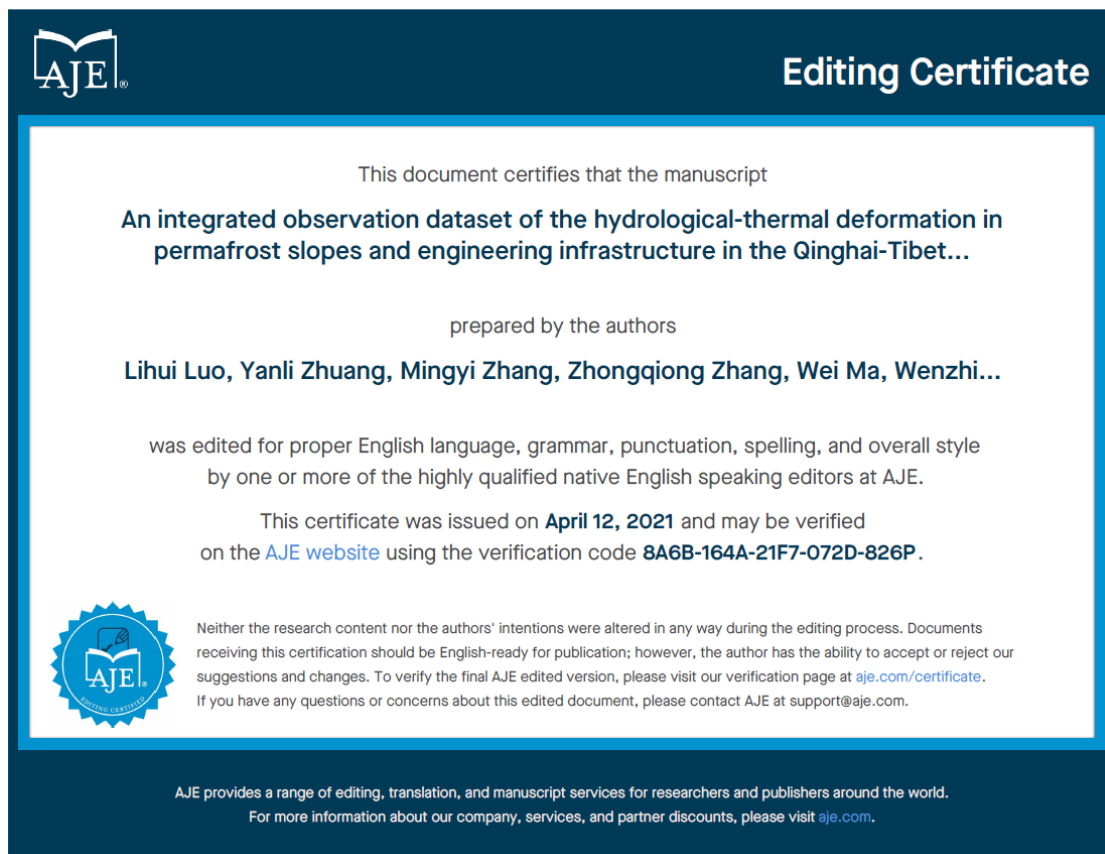

Figure R1. Editorial Certificate.

Therefore, I don't have any major suggestions on how to improve the manuscript. Please see some minor

comments below.

Minor comments:

1. Please provide a more detailed metadata description of the data set.

We have added metadata files README.md for all datasets and generated the corresponding html and pdf format files. The study area embeds Google Maps in the README.md file. Meteorological and ground observations, as well as the R code of permafrost indices and visualization, include the period from 1955 to 2019. TLS measurements and UAV RGB and TIR images are from 2014 to 2017. We have added a description of the time period in the main text and README.md.

2. It is recommended to add the running notes in the code, and increase the readability of the code, so that users can not only execute, but also modify and improve.

Thank you for the insightful comments. We have reorganized the code, added the required comments and instructions to the code, added a new instruction document on how to use the code, and added the README.md markdown file for operation of the code, including the corresponding html and pdf files. We have also recorded an operation video and provided it in README.md and README.html.

3. Please delete Figure B3. If possible, just describe it in the text.

We have deleted Figure B3.

4. The latest references need to be cited, and some references need to be added. As in the following article:

Wu, Q., Sheng, Y., Yu, Q., Chen, J., and Ma, W.: Engineering in the rugged permafrost terrain on the roof of the world under a warming climate, Permafrost and Periglacial Processes, 31, 417-428, <https://doi.org/10.1002/ppp.2059>, 2020.

We have added the indicated reference and updated some references in the manuscript.

5. This manuscript focuses on ground and drone monitoring data, so it is recommended to delete InSAR data.

As a supplement to the TLS point cloud data, we have prepared Sentinel-1 deformation data for the

freeze-thaw stage in the study area from 2014 to 2020 using interferometric synthetic aperture radar (InSAR) technology. These are the InSAR data for the entire study area. These data are a good supplement and comparison to the TLS point cloud data. We still retain these data in the TLS measurement dataset.

## References:

- Bessette-Kirton, E. K., and Coe, J. A.: A 36-Year Record of Rock Avalanches in the Saint Elias Mountains of Alaska, With Implications for Future Hazards, *Frontiers in Earth Science*, 8, <https://doi.org/10.3389/feart.2020.00293>, 2020.
- Guo, D., and Sun, J.: Permafrost Thaw and Associated Settlement Hazard Onset Timing over the Qinghai-Tibet Engineering Corridor, *International Journal of Disaster Risk Science*, 6, 347-358, <https://doi.org/10.1007/s13753-015-0072-3>, 2015.
- Huggel, C., Salzmann, N., Allen, S., Caplan-Auerbach, J., Fischer, L., Haeberli, W., Larsen, C., Schneider, D., and Wessels, R.: Recent and future warm extreme events and high-mountain slope stability, *Philosophical Transactions of the Royal Society A: Mathematical, Physical and Engineering Sciences*, 368, 2435-2459, <https://doi.org/10.1098/rsta.2010.0078>, 2010.
- Liu, G., Xie, C., Zhao, L., Xiao, Y., Wu, T., Wang, W., and Liu, W.: Permafrost warming near the northern limit of permafrost on the Qinghai-Tibetan Plateau during the period from 2005 to 2017: A case study in the Xidatan area, *Permafrost and Periglacial Processes*, <https://doi.org/10.1002/ppp.2089>, 2020.
- Luo, L., Ma, W., Zhao, W., Zhuang, Y., Zhang, Z., Zhang, M., Ma, D., and Zhou, Q.: UAV-based spatiotemporal thermal patterns of permafrost slopes along the Qinghai-Tibet Engineering Corridor, *Landslides*, 15, 2161-2172, <https://doi.org/10.1007/s10346-018-1028-7>, 2018a.
- Luo, L., Zhang, Z., Ma, W., Yi, S., and Zhuang, Y.: PIC v1.3: comprehensive R package for computing permafrost indices with daily weather observations and atmospheric forcing over the Qinghai-Tibet Plateau, *Geosci Model Dev*, 11, 2475-2491, <https://doi.org/10.5194/gmd-11-2475-2018>, 2018b.
- Ma, W., Niu, F., Akagawa, S., and Jin, D.: Slope instability phenomena in permafrost regions of Qinghai-Tibet Plateau, China, *Landslides*, 3, 260-264, <https://doi.org/10.1007/s10346-006-0045-0>, 2006.
- Ma, W., Mu, Y., Zhang, J., Yu, W., Zhou, Z., and Chen, T.: Lateral thermal influences of roadway and railway embankments in permafrost zones along the Qinghai-Tibet Engineering Corridor,

- Transportation Geotechnics, 21, <https://doi.org/10.1016/j.trgeo.2019.100285>, 2019.
- Niu, F., Luo, J., Lin, Z., Fang, J., and Liu, M.: Thaw-induced slope failures and stability analyses in permafrost regions of the Qinghai-Tibet Plateau, China, *Landslides*, 13, 55-65, <https://doi.org/10.1007/s10346-014-0545-2>, 2015.
- Obu, J., Westermann, S., Bartsch, A., Berdnikov, N., Christiansen, H. H., Dashtseren, A., Delaloye, R., Elberling, B., Etzelmüller, B., Kholodov, A., Khomutov, A., Kääb, A., Leibman, M. O., Lewkowicz, A. G., Panda, S. K., Romanovsky, V., Way, R. G., Westergaard-Nielsen, A., Wu, T., Yamkhin, J., and Zou, D.: Northern Hemisphere permafrost map based on TTOP modelling for 2000–2016 at 1 km<sup>2</sup> scale, *Earth-Science Reviews*, 193, 299-316, <https://doi.org/10.1016/j.earscirev.2019.04.023>, 2019.
- Patton, A. I., Rathburn, S. L., and Capps, D. M.: Landslide response to climate change in permafrost regions, *Geomorphology*, 340, 116-128, <https://doi.org/10.1016/j.geomorph.2019.04.029>, 2019.
- Qiu, G., Zhou, Y., Guo, D., and Wang, Y.: The map of geocryological regionalization and classification in China, Science Press, Beijing (in Chinese), 2000.
- Spaans, E. J. A., and Baker, J. M.: Examining the use of time domain reflectometry for measuring liquid water content in frozen soil, *Water Resour Res*, 31, 2917-2925, <https://doi.org/10.1029/95wr02769>, 1995.
- Streletskiy, D. A., Suter, L. J., Shiklomanov, N. I., Porfiriev, B. N., and Eliseev, D. O.: Assessment of climate change impacts on buildings, structures and infrastructure in the Russian regions on permafrost, *Environ Res Lett*, 14, <https://doi.org/10.1088/1748-9326/aaf5e6>, 2019.
- Wang, S., Niu, F., Chen, J., and Dong, Y.: Permafrost research in China related to express highway construction, *Permafrost and Periglacial Processes*, 31, 406-416, <https://doi.org/10.1002/ppp.2053>, 2020.
- Wirz, V., Geertsema, M., Gruber, S., and Purves, R. S.: Temporal variability of diverse mountain permafrost slope movements derived from multi-year daily GPS data, Mattertal, Switzerland, *Landslides*, 13, 67-83, <https://doi.org/10.1007/s10346-014-0544-3>, 2015.
- Wu, Q., Dong, X., Liu, Y., and Jin, H.: Responses of Permafrost on the Qinghai-Tibet Plateau, China, to Climate Change and Engineering Construction, *Arctic, Antarctic, and Alpine Research*, 39, 682-687, [https://doi.org/10.1657/1523-0430\(07-508\)\[wu\]2.0.Co;2](https://doi.org/10.1657/1523-0430(07-508)[wu]2.0.Co;2), 2007.
- Wu, Q., and Zhang, T.: Recent permafrost warming on the Qinghai-Tibetan Plateau, *Journal of*

- Geophysical Research, 113, <https://doi.org/10.1029/2007jd009539>, 2008.
- Yang, Y.-z., Wu, Q.-b., Deng, Y.-s., Jiang, G.-l., and Zhang, P.: Chemical Composition of Borehole Gas in Kunlun Pass Basin in Permafrost Regions in Qinghai-Tibet Plateau, *Natural Gas Geoscience*, 6, 2011.
- Yang, Y., Wu, Q., Jiang, G., and Zhang, P.: Stable Isotopic Stratification and Growth Patterns of Ground Ice in Permafrost on the Qinghai-Tibet Plateau, China, *Permafrost and Periglacial Processes*, 28, 119-129, <https://doi.org/10.1002/ppp.1892>, 2017.
- Yu, W., Zhang, T., Lu, Y., Han, F., Zhou, Y., and Hu, D.: Engineering risk analysis in cold regions: State of the art and perspectives, *Cold Regions Science and Technology*, 171, <https://doi.org/10.1016/j.coldregions.2019.102963>, 2020.
- Yuan, C., Yu, Q., You, Y., and Guo, L.: Deformation mechanism of an expressway embankment in warm and high ice content permafrost regions, *Appl Therm Eng*, 121, 1032-1039, <https://doi.org/10.1016/j.applthermaleng.2017.04.128>, 2017.
- Zhang, Z., Yu, Q., You, Y., Guo, L., Wang, X., Liu, G., and Wu, G.: Cooling effect analysis of temperature-controlled ventilated embankment in Qinghai-Tibet testing expressway, *Cold Regions Science and Technology*, 173, <https://doi.org/10.1016/j.coldregions.2020.103012>, 2020.
- Zhao, L., Zou, D., Hu, G., Du, E., Pang, Q., Xiao, Y., Li, R., Sheng, Y., Wu, X., Sun, Z., Wang, L., Wang, C., Ma, L., Zhou, H., and Liu, S.: Changing climate and the permafrost environment on the Qinghai-Tibet (Xizang) plateau, *Permafrost and Periglacial Processes*, 31, 396-405, <https://doi.org/10.1002/ppp.2056>, 2020.

# Data description for esd-2020-106

---

**An integrated observation dataset of the hydrological-thermal-deformation in the permafrost slopes and engineering infrastructure in the Qinghai-Tibet Engineering Corridor**

---

## Description

---

**Meteorological observations** Observation of meteorological factors was conducted at two permanent meteorological stations (Golmud and Wudaoliang) and one field meteorological station (Xidatan) with daily meteorological records. All three meteorological stations contain ground observations.

**Ground observations** The ground temperature and moisture data from the near-surface to within 270 cm in the active layer were recorded. In situ ground observations were deployed starting in July 2013 using thermocouple probes (105T, Campbell Scientific) to measure the soil temperature and using 11 time-domain reflectometer (TDR) probes (model CS615-L, Campbell Scientific) to measure the soil volumetric water content.

**TLS measurements** A FARO Focus3D X130 3D laser scanner and six Trimble 5700 GNSS systems were deployed around permafrost slopes between May 2014 and October 2015. As a supplement to the TLS point cloud data, we used Interferometric Synthetic Aperture Radar (InSAR) technology to prepare Sentinel-1 deformation data for the study area from 2014 to 2020.

**UAV RGB and TIR images** Two permafrost slopes were conducted four flight experiments with UAV-mounted RGB and TIR sensors in 2016 and 2017.

**R code of permafrost indices and visualization** R Script for plotting meteorological observation data and permafrost indices (MAAT and MAGST) during 1955-2018.

---

## Keywords

---

**Theme:** Permafrost slope; Permafrost engineering; Freeze-thaw; hydrological-thermal-Deformation; Qinghai-Tibet plateau

**Discipline:** cryosphere; In-situ monitoring data; Remote sensing data using TLS and UAV

**Places:** Qinghai-Tibet Engineering Corridor; Kunlun Mountain Pass close to Hoh Xil Nature Reserve

---

## Data details

---

**Scale:** UAV RGB: ~5 cm; UAV TIR: ~ 20 cm; TLS measurements: 0.009°

**Coordinate Reference System:** EPSG: 4326 - WGS 84

**Filesize:**~ 5 G

**Data format:** GeoTiff, CSV, EXCEL XLSX, TXT, WRP, Tif, JPG

---

## Space scope

---

North: 35°39' 10"  
West: 90°3' 30" - East: 90°3' 55"  
South: 35°38' 35"



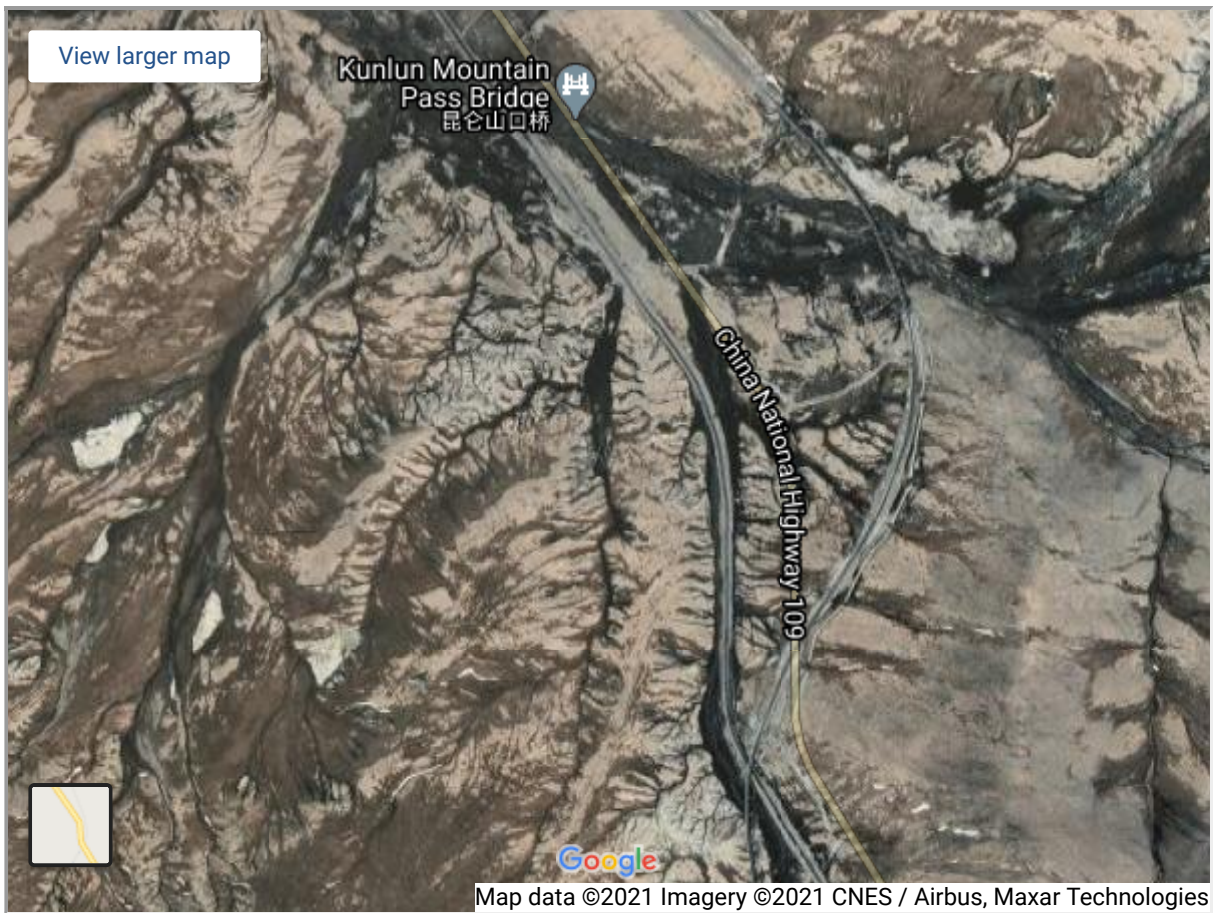

## Time period

**Table 1.** Observations period of all datasets.

| Data Type                   | Location           | Period    | Remark                     |
|-----------------------------|--------------------|-----------|----------------------------|
| Meteorological observations | Golmud station     | 1955-2018 | National Reference Station |
| Meteorological observations | Xidatan station    | 2014-2018 | National General Station   |
| Meteorological observations | Wudaoliang station | 1956-2018 | National Reference Station |
| Ground observations         | Study Area         | 2014-2019 | Field test site            |
| Ground observations         | Golmud station     | 1955-2018 | National Reference Station |

| Data Type                                      | Location           | Period    | Remark                                             |
|------------------------------------------------|--------------------|-----------|----------------------------------------------------|
| Ground observations                            | Xidatan station    | 2014-2018 | National General Station                           |
| Ground observations                            | Wudaoliang station | 1956-2018 | National Reference Station                         |
| TLS measurements                               | Study Area         | 2014-2015 | Contains measurement and comparative analysis data |
| InSAR                                          | Study Area         | 2014-2020 | Contains thawing and freezing period data          |
| UAV RGB and TIR images                         | Study Area         | 2016-2017 | tif & jpg can be processed by Pix4Dmapper & FLIR   |
| R code of permafrost indices and visualization | Stations           | 1955-2018 | Plot Fig. 2 & F1; Computing MAAT & MAGST           |

## Meteorological and Ground observations

**Table 2.** Observations period of datasets.

| Data Type                   | Location           | Period    | File Names                                                                 |
|-----------------------------|--------------------|-----------|----------------------------------------------------------------------------|
| Meteorological observations | Golmud station     | 1955-2018 | Meteo_52818_Golmud_1955-2010.dat;Meteo_52818_Golmud_2010-2018.xlsx         |
| Meteorological observations | Xidatan station    | 2014-2018 | Meteo_00000_Golmud_2014-2019.xlsx                                          |
| Meteorological observations | Wudaoliang station | 1956-2018 | Meteo_52908_Wudaoliang_1956-2010.dat;Meteo_52908_Wudaoliang_2010-2018.xlsx |
| Ground observations         | Study Area         | 2014-2019 | GT00000_Slopes_2014-2019.xlsx                                              |

| Data Type           | Location           | Period    | File Names                         |
|---------------------|--------------------|-----------|------------------------------------|
| Ground observations | Golmud station     | 1955-2018 | GT52818_Golmud.txt                 |
| Ground observations | Xidatan station    | 2014-2018 | Meteo_00000_Xidatan_2014-2019.xlsx |
| Ground observations | Wudaoliang station | 1956-2018 | GT52908_Wudaoliang.txt             |

**Table 3.** Ground data Metadata of meteorological stations data. The file name with 'GT' is ground observation data.

|   | ID | Variable                                 | Type      | Field Name | Unit  | Description |
|---|----|------------------------------------------|-----------|------------|-------|-------------|
| 1 | 1  | Station ID                               | Number(5) | V01000     |       |             |
| 2 | 5  | Year                                     | Number(4) | V04001     | Year  |             |
| 3 | 6  | Month                                    | Number(2) | V04002     | Month |             |
| 4 | 7  | Day                                      | Number(2) | V04003     | Day   |             |
| 5 | 32 | Evaporation                              | Number(6) | V13241     | 0.1mm | evaporation |
| 6 | 53 | average ground temperature at 0 cm       | Number(6) | V12240     | 0.1°C | GT_0_AVG    |
| 7 | 54 | daily maximum ground temperature at 0 cm | Number(6) | V12213     | 0.1°C | GT_0_MAX    |
| 8 | 56 | daily minimum ground temperature at 0 cm | Number(6) | V12214     | 0.1°C | GT_0_MIN    |

|    | <b>ID</b> | <b>Variable</b>                      | <b>Type</b> | <b>Field Name</b> | <b>Unit</b> | <b>Description</b> |
|----|-----------|--------------------------------------|-------------|-------------------|-------------|--------------------|
| 9  | 58        | average ground temperature at 5 cm   | Number(6)   | V12240_005        | 0.1°C       | GT_5_AVG           |
| 10 | 59        | average ground temperature at 10 cm  | Number(6)   | V12240_010        | 0.1°C       | GT_10_AVG          |
| 11 | 60        | average ground temperature at 15 cm  | Number(6)   | V12240_015        | 0.1°C       | GT_15_AVG          |
| 12 | 61        | average ground temperature at 20 cm  | Number(6)   | V12240_020        | 0.1°C       | GT_20_AVG          |
| 13 | 62        | average ground temperature at 40 cm  | Number(6)   | V12240_040        | 0.1°C       | GT_40_AVG          |
| 14 | 63        | average ground temperature at 50 cm  | Number(6)   | V12240_050        | 0.1°C       | GT_50_AVG          |
| 15 | 64        | average ground temperature at 80 cm  | Number(6)   | V12240_080        | 0.1°C       | GT_80_AVG          |
| 16 | 65        | average ground temperature at 160 cm | Number(6)   | V12240_160        | 0.1°C       | GT_160_AVG         |
| 17 | 66        | average ground temperature at 320 cm | Number(6)   | V12240_320        | 0.1°C       | GT_320_AVG         |

| ID | Variable | Type | Field Name | Unit | Description |
|----|----------|------|------------|------|-------------|
|----|----------|------|------------|------|-------------|

**Table 4.** Meteorological Metadata of meteorological stations data. The file name with 'Meteo' is Meteorological observation data.

| ID | Variable                           | Type      | Unit  | Description |
|----|------------------------------------|-----------|-------|-------------|
| 1  | Station ID                         | Number(5) |       |             |
| 2  | Year                               | Number(4) | Year  | Year        |
| 3  | Month                              | Number(2) | Month | Mon         |
| 4  | Day                                | Number(2) | Day   | Day         |
| 5  | daily mean air temperature at 2 m  | Number(6) | 0.1°C | Temperate   |
| 6  | maximum air temperature at 2 m     | Number(6) | 0.1°C | Tmax        |
| 7  | minimum air temperature at 2 m     | Number(6) | 0.1°C | Tmin        |
| 8  | average wind speed                 | Number(6) | 0.1°C | Wind        |
| 9  | average precipitation              | Number(6) | 0.1mm | Precip      |
| 10 | Corrected average precipitation    | Number(6) | 0.1°C | Corrected_P |
| 11 | Evaporation                        | Number(6) | 0.1mm | Evaporation |
| 12 | Air humidity                       | Number(6) | %     | Humidity    |
| 13 | Air pressure                       | Number(6) | 0.1Pa | Press       |
| 14 | sunshine time                      | Number(6) | 0.1h  | Sunshine    |
| 15 | average ground temperature at 0 cm | Number(6) | 0.1°C | GT          |

## TLS measurements

**TLS measurements** There are a total of 4 monitorings between May 2014 and October 2015 within two thawing periods and a freezing period. The three freeze-thaw phases are referred to as “first thawing” (May 2014 to October 2014, called here “period 2-1”), “first

freezing” (October 2014 to May 2015, called here “period 3-2”), “second thawing” (May 2015 to October 2015, called here “period 4-3”), “one thawing and one freezing stage” (May 2014 to May 2015, called here “period 3-1”), and “two thawing and one freezing stage” (May 2014 to October 2015, called here “period 4-1”) in the following. The file directories for each monitoring are: first, second, third, and fourth. And the file also contains comparative analysis data of different periods.

**Table 5** Freeze-thaw stages of TLS scanner data.

| Status     | Condition                    | Date Span             | Days | Slope   | Data points |
|------------|------------------------------|-----------------------|------|---------|-------------|
| Period 2-1 | Thawing                      | 05/02/2014–10/10/2014 | 161  | Slope A | 1251706     |
| Period 2-1 | Thawing                      | 05/02/2014–10/10/2014 | 161  | Slope B | 1367438     |
| Period 3-2 | Freezing                     | 10/10/2014–05/03/2015 | 205  | Slope A | 1291356     |
| Period 3-2 | Freezing                     | 10/10/2014–05/03/2015 | 205  | Slope B | 1366141     |
| Period 4-3 | Thawing                      | 05/03/2015–10/04/2015 | 154  | Slope A | 1248325     |
| Period 4-3 | Thawing                      | 05/03/2015–10/04/2015 | 154  | Slope B | 1382768     |
| Period 3-1 | one thawing and one freezing | 05/02/2014–05/03/2015 | 366  | Slope A | 1278448     |
| Period 3-1 | one thawing and one freezing | 05/02/2014–05/03/2015 | 366  | Slope B | 1279204     |
| Period 4-1 | two thawing and one freezing | 05/02/2014–10/04/2015 | 520  | Slope A | 1279706     |
| Period 4-1 | two thawing and one freezing | 05/02/2014–10/04/2015 | 520  | Slope B | 1207493     |

**InSAR data** The Sentinel-1 mission provides data from a dual-polarization C-band Synthetic Aperture Radar (SAR) instrument. This collection includes the S1 Ground Range Detected (GRD) scenes, processed using the Sentinel-1 Toolbox to generate a calibrated, ortho-corrected product. File directory is InSAR.

**Table 6.** InSAR data for Permafrost slope A & B, including the study area vector shapefile (SlopeAB). Direction of the orbit ('ASCENDING' or 'DESCENDING') for the oldest image data in the product (the start of the product). The spatial resolution is 10 meters.

| Data Type           | Period    | Condition | Remark            |
|---------------------|-----------|-----------|-------------------|
| asc                 | 2014-2016 | Tawing    | ASCENDING         |
| asc                 | 2014-2017 | Freezing  | ASCENDING         |
| asc                 | 2017-2019 | Tawing    | ASCENDING         |
| asc                 | 2017-2020 | Freezing  | ASCENDING         |
| desc                | 2014-2016 | Tawing    | DESCENDING        |
| desc                | 2014-2017 | Freezing  | DESCENDING        |
| desc                | 2017-2019 | Tawing    | DESCENDING        |
| desc                | 2017-2020 | Freezing  | DESCENDING        |
| Study Area boundary |           |           | SlopeAB:Shapefile |

## UAV RGB and TIR images

For these two slopes, we conducted four flight experiments with UAV-mounted RGB and TIR sensors. The directory of flight images for RGB and thermal infrared sensors is RGB and TIR.

There are three directories under the RGB directory: **20160417**, **20160830** and **20170822**, the format is `yyyymmdd`, which represent the UAV photos taken by the RGB camera that day. Please use **exiftool** to view the metadata information of pictures such as timestamp and location.

There are three directories under the TIR directory: **2016SlopeA** and **2017SlopeAB**, the format is `yyyySlope`, which represent UAV photos taken by the TIR sensor of the year.

Please use exiftool to view the metadata information of pictures such as timestamp, location, and center point temperature.

To obtain temperatures, a sensor that is able to provide absolute temperature is needed (instead of relative temperature). The FLIR Vue Pro and the Zenmuse XT do not provide absolute temperature. However, the FLIR Vue Pro and the Zenmuse XT both have a radiometric version that does record absolute temperature. It is recommended to do the processing with the uncompressed Tiff images and create the following index to view absolute temperature.

```
0.04*thermal_ir - 273.15
```

- This also applies (with the same formula) to the newer Wiris camera.
- The Thermomap camera from senseFly also records absolute temperature. The corresponding index is

```
0.01*thermal_ir - 100
```

- This index is already present in the software and is loaded automatically for Thermomap projects.

### How to get the coefficient of Tiff format? or is the coefficient variable?

A **new method** to build the function.

1. Use exiftool software (Ubuntu) to get the meta of TIFF or JPG data.

```
exiftool DJI_0777.tif
```

2. Find "Central Temperature".

```
exiftool DJI_0777.tif|grep "Central Temperature"
```

3. Get the Min/Max Digital Values of TIFF or JPG data from ARCGIS or QGIS.
4. Central temperature is the min temperature in my data through the analysis of FLIR Tools, PLEASE NOTICE, this may be different.
5. Build a linear equation between Digital Values and Central Temperature.
6. Get temperature from TIFF or JPG format data through the equation.
7. And then, we can do anything, such as simple operation and modeling using Matlab, R, Python ...



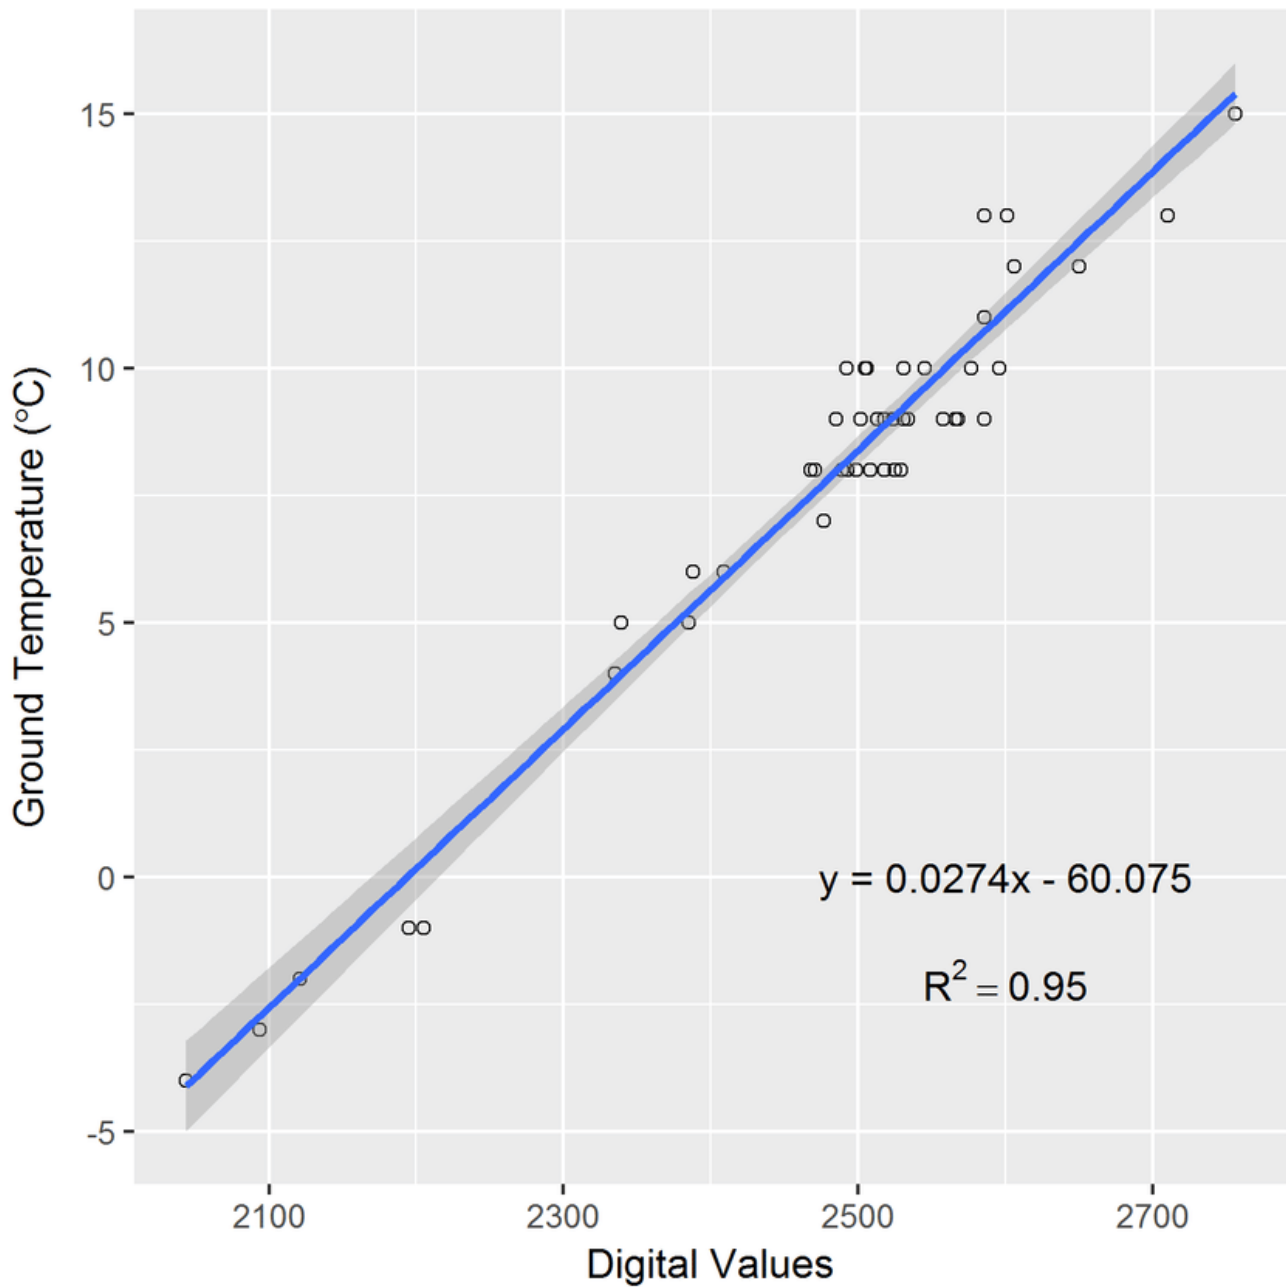

**Figure 1.** The linear equation between Digital Values and Central Temperature.

**Table 7.** UAV flight time during the 2016-2017.

| Flight Date | Flight Time | Height | Slope          | Sensor |
|-------------|-------------|--------|----------------|--------|
| yyyymmdd    | hh:mm       | m      |                |        |
| 20160417    | 13:36-13:56 | 20-120 | Slopes A and B | RGB    |
| 20160830    | 10:18-13:55 | 120    | Slopes A and B | RGB    |
| 20170822    | 11:26-13:46 | 120    | Slopes A and B | RGB    |
| 20160830    | 12:47-12:52 | 30     | Slope A        | TIR    |

| Flight Date | Flight Time | Height | Slope          | Sensor |
|-------------|-------------|--------|----------------|--------|
| 20170722    | 11:00-15:51 | 150    | Slopes A and B | TIR    |
| 20170823    | 10:30-17:25 | 150    | Slopes A and B | TIR    |

**Table 8.** Processed UAV data.

| Data Type | Remark                |
|-----------|-----------------------|
| Boundary  | SlopeAB:Shapefile     |
| DSM       | SM_SlopeAB:Raster     |
| Mosaic    | Mosaic_SlopeAB:Raster |

## R code of permafrost indices and visualization

### Script

#### MAAT.R

- Function for computing Mean Annual Air Temperature (MAAT) index

#### MAGST.R

- Function for computing Mean Annual Ground Surface Temperature (MAGST) index

#### Meteorological.R

- Plot Meteorological station observation data, MAAT and MAGST indices

### Data

The **Data directory** “./Data” contains the following data:

**Table 9.** Data files.

| Data file                                  | Description                                                                                                                                  |
|--------------------------------------------|----------------------------------------------------------------------------------------------------------------------------------------------|
| Golmud1955-2018.csv                        | Meteorological observations of Golmud field station                                                                                          |
| Wudaoliang1956-2018.csv                    | Meteorological observations of Wudaoliang field station                                                                                      |
| XDTMS2014-2018.csv                         | Meteorological observations of Xidatan field station                                                                                         |
| XDTMS2014-2018_GT.csv                      | Xidatan field station, ONLY Ground Temperature in different layers                                                                           |
| XDTMS2014-2018_PREC.csv                    | Xidatan field station, ONLY Precipitation                                                                                                    |
| MAAT_MAGST_Golmud_Wudaoliang_1956-2018.csv | After running MAAT and MAGST, the data of the two field stations need to be merged together for drawing. This data has been manually merged. |

The **output data** is also placed in this directory “./Data”.

## Figure

The output Figures are placed in Figure directory ‘./Figure’, and the **operation video** are also placed in this directory.

## Usage

**Please execute the following statement in Rstudio or R software.**

First, please install **ggplot2** package in Rstudio or R software, and set the environment variables.

```
install.packages('ggplot2')  
library('ggplot2')
```

```

# Init
# clear the environment
rm(list=ls())
# set workdir
# setwd('./Script')
# Data directory
DataRoot <- './Data'
# Figure directory
FigRoot <- './Figure'

```

and then run Meteorological.R.

```
source('Meteorological.R')
```

Or copy the code in Meteorological.R **in turn** and execute it in Rstudio or R software.

MAAT.R and MAGST.R have been implemented in Meteorological.R, **no additional execution is required.**

```
source('MAAT.R')
source('MAGST.R')
```

## Operation video

The screenshot displays the RStudio interface. The main editor window shows the Meteorological.R script with the following content:

```

1 # plot Meteorological station observation data, MAAT and MAGST permafrost indices
2 #
3 # Author: Lijun Luo (E-mail: luojh@lzb.ac.cn)
4 # cold and arid regions Environmental and Engineering Research Institute,
5 # or new institute name, the same institute to me, just changed a name
6 # Northwest Institute of Eco-Environment and Resources,
7 # Chinese Academy of Sciences
8 # updated: 30/03/2021
9 #
10 #
11 # load packages
12 library(ggplot2)
13 #
14 # Init
15 # clear the environment
16 rm(list=ls())
17 #
18 # set workdir
19 #setwd("./QTEC")
20 #
21 # Data directory
22 DataRoot <- './Data'
23 #
24 # Figure directory
25 FigRoot <- './Figure'
26 #
27 #####
28 # Run MAAT.R & MAGST.R R files
29 #####
30 source('MAAT.R')
31 source('MAGST.R')
32 #
33 '

```

The Environment pane on the right shows the following objects:

| Object         | Value                                                     |
|----------------|-----------------------------------------------------------|
| go             | 22980 obs. of 5 variables                                 |
| mg             | List of 9                                                 |
| mgw            | 228 obs. of 4 variables                                   |
| wu             | 22737 obs. of 5 variables                                 |
| xd             | 1826 obs. of 4 variables                                  |
| xdt            | List of 9                                                 |
| xdt_p          | List of 9                                                 |
| DataRoot       | "./Data"                                                  |
| FigRoot        | "./Figure"                                                |
| Freezing_Index | function (Year, Tempname, data = QTP_ATM)                 |
| MAAT           | function (Year, Tempname = "Temperature", data = QTP_ATM) |

The Files pane shows the project structure:

| Name             | Size     | Modified             |
|------------------|----------|----------------------|
| ..               |          |                      |
| RData            | 343.5 KB | Mar 8, 2021, 3:34 PM |
| Rhistory         | 16.1 KB  | Mar 8, 2021, 3:34 PM |
| Data             |          |                      |
| Figure           |          |                      |
| MAAT.R           | 3.6 KB   | Mar 3, 2021, 4:48 PM |
| MAGST.R          | 5.5 KB   | Mar 3, 2021, 4:48 PM |
| Meteorological.R | 4.8 KB   | Mar 4, 2021, 8:21 AM |
| README.md        | 2.4 KB   | Mar 8, 2021, 3:16 PM |
| Script.Rproj     | 218 B    | Mar 8, 2021, 3:40 PM |

The Console window shows the R version and platform information:

```

R version 4.0.2 (2020-06-22) -- "Taking Off Again"
Copyright (C) 2020 The R Foundation for Statistical Computing
Platform: x86_64-w64-mingw32/x64 (64-bit)

```

The console also displays the R license text in Chinese and English, and the workspace loaded from the project.

## Requirements

---

- RStudio Version 1.3.959 or later
- R Statistical Computing Software, 4.0.2 or later
- Package ggplot2 version 3.3.2

## Article DOI

---

- <https://doi.org/10.5194/essd-2020-106>
- This article contains all the data DOI.

## Citation

---

Luo, L., Zhuang, Y., Zhang, M., Zhang, Z., Ma, W., Zhao, W., Zhao, L., Wang, L., Shi, Y., Zhang, Z., Duan, Q., Tian, D., and Zhou, Q.: An integrated observation dataset of the hydrological-thermal-deformation dynamics in the permafrost slopes and engineering infrastructure in the Qinghai-Tibet Engineering Corridor, Earth Syst. Sci. Data Discuss. [preprint], <https://doi.org/10.5194/essd-2020-106>, in review, 2020.

## Abbreviation

---

- **TDR:** Time-domain Reflectometer
  - **TLS:** Terrestrial Laser Scanning
  - **UAV:** Unmanned Aerial Vehicle
  - **RGB:** Red-Green-Blue
  - **TIR:** Thermal Infrared
  - **InSAR:** Interferometric Synthetic Aperture Radar
  - **MAAT:** Mean Annual Air Temperature
  - **MAGST:** Mean Annual Ground Surface Temperature
-

## Data resource provider

---

### **Lihui Luo**

Northwest Institute of Eco-Environment and Resources, Chinese Academy of Sciences  
[luoh@lzb.ac.cn](mailto:luoh@lzb.ac.cn)

### **Yanli Zhuang**

Northwest Institute of Eco-Environment and Resources, Chinese Academy of Sciences  
[zhuangyl@lzb.ac.cn](mailto:zhuangyl@lzb.ac.cn)

### **Mingyi Zhang**

Northwest Institute of Eco-Environment and Resources, Chinese Academy of Sciences  
[myzhang@lzb.ac.cn](mailto:myzhang@lzb.ac.cn)

### **Zhongqiong Zhang**

Northwest Institute of Eco-Environment and Resources, Chinese Academy of Sciences  
[zhangzq@lzb.ac.cn](mailto:zhangzq@lzb.ac.cn)

### **Wei Ma**

Northwest Institute of Eco-Environment and Resources, Chinese Academy of Sciences  
[mawei@lzb.ac.cn](mailto:mawei@lzb.ac.cn)

### **Wenzhi Zhao**

Northwest Institute of Eco-Environment and Resources, Chinese Academy of Sciences  
[zhaowzh@lzb.ac.cn](mailto:zhaowzh@lzb.ac.cn)

### **Lin Zhao**

Northwest Institute of Eco-Environment and Resources, Chinese Academy of Sciences  
[linzhao@lzb.ac.cn](mailto:linzhao@lzb.ac.cn)

### **Li Wang**

Qinghai Institute of Meteorological Science  
[liw0209@sohu.com](mailto:liw0209@sohu.com)

### **Yanmei Shi**

32016 PLA Troops

### **Ze Zhang**

Northwest Institute of Eco-Environment and Resources, Chinese Academy of Sciences  
[zhangze@lzb.ac.cn](mailto:zhangze@lzb.ac.cn)

### **Quntao Duan**

Northwest Institute of Eco-Environment and Resources, Chinese Academy of Sciences  
[duanqt@lzb.ac.cn](mailto:duanqt@lzb.ac.cn)

### **Deyu Tian**

Northwest Institute of Eco-Environment and Resources, Chinese Academy of Sciences  
[tiandy@lzb.ac.cn](mailto:tiandy@lzb.ac.cn)

### **Qingguo Zhou**

Lanzhou University  
[zhougg@lzu.edu.cn](mailto:zhougg@lzu.edu.cn)

---

## **Data Sources and Terms of Use**

---

The use of data is conditional on citing the original data sources. Full details on how to cite the data are given at the bottom of each page. For research projects, if the data are essential to the work, or if an important result or conclusion depends on the data, co-authorship may need to be considered. Permafrost engineering and slope monitoring facilitate the acquisition of data to encourage its use and promote understanding of the potential impact of freeze-thaw cycles on Permafrost engineering. Respecting original data sources is key to help secure the support of data providers to enhance, maintain and update valuable data.

---

## **Acknowledgements**

---

Funded by the National Natural Science Foundation of China (41871065), the National Science Fund for Distinguished Young Scholars (41825015), the Key Research Project of Frontier Science of Chinese Academy of Sciences (QYZDJ-SSW-DQC040), and the Strategic Priority Research Program of the Chinese Academy of Sciences (XDA19090122).

---

## **License**

---

## Contact

---

**Dr. Lihui Luo**

Northwest Institute of Eco-Environment and Resources, Chinese Academy of Sciences

[luoh@lzb.ac.cn](mailto:luoh@lzb.ac.cn)

---

updated: 2021/04/14
